# Supplementary material for: The Influence of Chimeric Antigen Receptor Structural Domains on Clinical Outcomes and Associated Toxicities
Source: PubMed Central journal article supplement (PMC7794933; doi:10.3390/cancers13010038), 2020-12-25
Supplement: cancers-13-00038-s001.pdf [file cancers-13-00038-s001.pdf]

# Supplementary Materials: The Influence of Chimeric Antigen Receptor Structural Do-mains on Clinical Outcomes and Associated Toxicities

Ashleigh S. Davey, Matthew E. Call and Melissa J. Call

**Table S1.** Number and grade of patients diagnosed with CRS in each anti-CD19 CAR-T cell clinical trial.

| NCT ID      | CAR Name     | CAR domain structure |              |              |        |             | No. of patients | Clinical Response (No. of patients) |    |    |     |    |
|-------------|--------------|----------------------|--------------|--------------|--------|-------------|-----------------|-------------------------------------|----|----|-----|----|
|             |              | ScFv                 | Hinge        | TM           | Costim | Signal      |                 | SD                                  | PD | PR | CR  | NR |
| NCT02842138 | CD19-BBz(86) | FMC63                | CD8 $\alpha$ | CD8 $\alpha$ | 41BB   | CD3 $\zeta$ | 7               | 1                                   | 1  | 3  | 2   | 0  |
| NCT02842138 | CD19-BBz(86) | FMC63                | CD8 $\alpha$ | CD8 $\alpha$ | 41BB   | CD3 $\zeta$ | 13              | 1                                   | 6  | 4  | 5   | 0  |
| NCT02030834 | CTL-019      | FMC63                | CD8 $\alpha$ | CD8 $\alpha$ | 41BB   | CD3 $\zeta$ | 28              | -                                   | -  | 2  | 16  | 12 |
| NCT02445248 | CTL-019      | FMC63                | CD8 $\alpha$ | CD8 $\alpha$ | 41BB   | CD3 $\zeta$ | 93              | 14                                  | 24 | 11 | 37  | 7  |
| NCT01626495 | CTL-019      | FMC63                | CD8 $\alpha$ | CD8 $\alpha$ | 41BB   | CD3 $\zeta$ | 30              | 3                                   | 0  | 3  | 27  | 0  |
| NCT01029366 |              |                      |              |              |        |             |                 |                                     |    |    |     |    |
| NCT02435849 | CTL-019      | FMC63                | CD8 $\alpha$ | CD8 $\alpha$ | 41BB   | CD3 $\zeta$ | 75              | 0                                   | 6  | 16 | 45  | 8  |
| NCT02631044 | JCAR017      | FMC63                | CD8 $\alpha$ | CD8 $\alpha$ | 41BB   | CD3 $\zeta$ | 255             | -                                   | -  | 51 | 135 | 69 |
| NCT01860937 | 19-28z       | FMC63                | CD28         | CD28         | CD28   | CD3 $\zeta$ | 25              | 0                                   | 6  | 0  | 18  | 1  |
| NCT01044069 | 19-28z       | FMC63                | CD28         | CD28         | CD28   | CD3 $\zeta$ | 53              | -                                   | -  | -  | 44  | 1  |
| NCT00466531 | 19-28z       | FMC63                | CD28         | CD28         | CD28   | CD3 $\zeta$ | 16              | 7                                   | 5  | 0  | 3   | 1  |
| NCT01840566 | 19-28z       | FMC63                | CD28         | CD28         | CD28   | CD3 $\zeta$ | 15              | 2                                   | 4  | 0  | 8   | 1  |
| NCT02601313 | KTE-X19      | FMC63                | CD28         | CD28         | CD28   | CD3 $\zeta$ | 68              | 2                                   | 2  | 16 | 40  | 8  |
| NCT02348216 | KTE-C19      | FMC63                | CD28         | CD28         | CD28   | CD3 $\zeta$ | 101             | 11                                  | 5  | 28 | 55  | 2  |
| NCT00924326 | CAR-19       | FMC63                | CD28         | CD28         | CD28   | CD3 $\zeta$ | 17              | 1                                   | 3  | 4  | 9   | 0  |
| NCT01593696 | FMC63-28z    | FMC63                | CD28         | CD28         | CD28   | CD3 $\zeta$ | 21              | 3                                   | 4  | 0  | 14  | 0  |
| NCT02963038 | SENL-B19     | FMC63                | CD28         | CD28         | 41BB   | CD3 $\zeta$ | 10              | 0                                   | 0  | 1  | 8   | 1  |
| NCT01865617 | -            | FMC63                | IgG4         | CD28         | 41BB   | CD3 $\zeta$ | 32              | -                                   | -  | 9  | 10  | 13 |

CR, Complete Response; NR, No Record; PD, Progressive Disease; PR, Partial Response; SD, Stable Disease

**Table S2.** Number and grade of patients diagnosed with CRS in each anti-CD19 CAR-T cell clinical trial.

| NCT ID      | CAR Name     | CAR domain structure |              |              |        |             | No. of patients | CRS patient diagnosis (No. of patients) |         |         |         |          |
|-------------|--------------|----------------------|--------------|--------------|--------|-------------|-----------------|-----------------------------------------|---------|---------|---------|----------|
|             |              | ScFv                 | Hinge        | TM           | Costim | Signal      |                 | None                                    | Grade 1 | Grade 2 | Grade 3 | Grade 4+ |
| NCT02842138 | CD19-BBz(86) | FMC63                | CD8 $\alpha$ | CD8 $\alpha$ | 41BB   | CD3 $\zeta$ | 7               | 6                                       | 1       | 0       | 0       | 0        |
| NCT02842138 | CD19-BBz(86) | FMC63                | CD8 $\alpha$ | CD8 $\alpha$ | 41BB   | CD3 $\zeta$ | 16              | 11                                      | 5       | 0       | 0       | 0        |
| NCT02030834 | CTL-019      | FMC63                | CD8 $\alpha$ | CD8 $\alpha$ | 41BB   | CD3 $\zeta$ | 28              | 12                                      | 0       | 11      | 4       | 1        |
| NCT02445248 | CTL-019      | FMC63                | CD8 $\alpha$ | CD8 $\alpha$ | 41BB   | CD3 $\zeta$ | 111             | 47                                      | 40      | 15      | 9       |          |
| NCT01626495 | CTL-019      | FMC63                | CD8 $\alpha$ | CD8 $\alpha$ | 41BB   | CD3 $\zeta$ | 30              | 0                                       | 22      | 8       | 0       |          |
| NCT01029366 |              |                      |              |              |        |             |                 |                                         |         |         |         |          |
| NCT02435849 | CTL-019      | FMC63                | CD8 $\alpha$ | CD8 $\alpha$ | 41BB   | CD3 $\zeta$ | 75              | 17                                      | 23      | 16      | 19      |          |
| NCT02631044 | JCAR017      | FMC63                | CD8 $\alpha$ | CD8 $\alpha$ | 41BB   | CD3 $\zeta$ | 268             | 155                                     | 107     | 6       |         |          |
| NCT01860937 | 19-28z       | FMC63                | CD28         | CD28         | CD28   | CD3 $\zeta$ | 25              | 5                                       | 16      | 4       |         |          |
| NCT01044069 | 19-28z       | FMC63                | CD28         | CD28         | CD28   | CD3 $\zeta$ | 53              | 8                                       | 31      | 14      |         |          |
| NCT00466531 | 19-28z       | FMC63                | CD28         | CD28         | CD28   | CD3 $\zeta$ | 16              | 0                                       | 4       | 10      | 1       | 1        |
| NCT01840566 | 19-28z       | FMC63                | CD28         | CD28         | CD28   | CD3 $\zeta$ | 15              | 9                                       | 0       | 3       | 2       | 1        |
| NCT02601313 | KTE-X19      | FMC63                | CD28         | CD28         | CD28   | CD3 $\zeta$ | 68              | 6                                       | 20      | 32      | 8       | 2        |
| NCT02348216 | KTE-C19      | FMC63                | CD28         | CD28         | CD28   | CD3 $\zeta$ | 101             | 7                                       | 81      | 13      | 0       | 0        |
| NCT00924326 | CAR-19       | FMC63                | CD28         | CD28         | CD28   | CD3 $\zeta$ | 17              | 9                                       | 5       | 3       | 0       |          |
| NCT01593696 | FMC63-28z    | FMC63                | CD28         | CD28         | CD28   | CD3 $\zeta$ | 21              | 5                                       | 8       | 2       | 3       | 3        |
| NCT02963038 | SENL-B19     | FMC63                | CD28         | CD28         | 41BB   | CD3 $\zeta$ | 10              | 0                                       | 5       | 1       | 3       | 1        |
| NCT01865617 | -            | FMC63                | IgG4         | CD28         | 41BB   | CD3 $\zeta$ | 32              | 12                                      | 5       | 6       | 6       | 3        |

**Table S3.** Number and grade of patients diagnosed with neurotoxicity in each anti-CD19 CAR-T cell clinical trial.

| NCT ID      | CAR Name     | CAR domain structure |              |              |        |             | No. of patients | Neurotoxicity patient diagnosis (No. of patients) |         |         |         |          |
|-------------|--------------|----------------------|--------------|--------------|--------|-------------|-----------------|---------------------------------------------------|---------|---------|---------|----------|
|             |              | ScFv                 | Hinge        | TM           | Costim | Signal      |                 | None                                              | Grade 1 | Grade 2 | Grade 3 | Grade 4+ |
| NCT02842138 | CD19-BBz(86) | FMC63                | CD8 $\alpha$ | CD8 $\alpha$ | 41BB   | CD3 $\zeta$ | 7               | 7                                                 | 0       | 0       | 0       | 0        |
| NCT02842138 | CD19-BBz(86) | FMC63                | CD8 $\alpha$ | CD8 $\alpha$ | 41BB   | CD3 $\zeta$ | 16              | 16                                                | 0       | 0       | 0       | 0        |
| NCT02030834 | CTL-019      | FMC63                | CD8 $\alpha$ | CD8 $\alpha$ | 41BB   | CD3 $\zeta$ | 28              | 17                                                | 4       | 4       | 1       | 2        |
| NCT02445248 | CTL-019      | FMC63                | CD8 $\alpha$ | CD8 $\alpha$ | 41BB   | CD3 $\zeta$ | 111             | 88                                                | 10      |         | 8       | 5        |
| NCT01626495 | CTL-019      | FMC63                | CD8 $\alpha$ | CD8 $\alpha$ | 41BB   | CD3 $\zeta$ | 30              | -                                                 | -       | -       | -       | -        |
| NCT01029366 |              |                      |              |              |        |             |                 |                                                   |         |         |         |          |
| NCT02435849 | CTL-019      | FMC63                | CD8 $\alpha$ | CD8 $\alpha$ | 41BB   | CD3 $\zeta$ | 75              | 45                                                | 20      |         | 10      | 0        |
| NCT02631044 | JCAR017      | FMC63                | CD8 $\alpha$ | CD8 $\alpha$ | 41BB   | CD3 $\zeta$ | 268             | 188                                               | 53      |         |         | 27       |
| NCT01860937 | 19-28z       | FMC63                | CD28         | CD28         | CD28   | CD3 $\zeta$ | 25              | 7                                                 | 11      |         |         | 7        |
| NCT01044069 | 19-28z       | FMC63                | CD28         | CD28         | CD28   | CD3 $\zeta$ | 53              | 30                                                | 1       |         |         | 19       |
| NCT00466531 | 19-28z       | FMC63                | CD28         | CD28         | CD28   | CD3 $\zeta$ | 16              | 10                                                | 3       | 2       | 1       | 0        |
| NCT01840566 | 19-28z       | FMC63                | CD28         | CD28         | CD28   | CD3 $\zeta$ | 15              | 5                                                 | 0       | 1       | 5       | 4        |
| NCT02601313 | KTE-X19      | FMC63                | CD28         | CD28         | CD28   | CD3 $\zeta$ | 68              | 25                                                | 13      | 9       | 15      | 6        |
| NCT02348216 | KTE-C19      | FMC63                | CD28         | CD28         | CD28   | CD3 $\zeta$ | 101             | 36                                                | 37      | 28      | 0       | 36       |
| NCT00924326 | CAR-19       | FMC63                | CD28         | CD28         | CD28   | CD3 $\zeta$ | 17              | 5                                                 | 5       |         |         | 7        |
| NCT01593696 | FMC63-28z    | FMC63                | CD28         | CD28         | CD28   | CD3 $\zeta$ | 21              | 15                                                | 2       | 3       | 1       | 0        |
| NCT02963038 | SENL-B19     | FMC63                | CD28         | CD28         | 41BB   | CD3 $\zeta$ | 10              | 4                                                 | 0       | 0       | 5       | 1        |
| NCT01865617 | -            | FMC63                | IgG4         | CD28         | 41BB   | CD3 $\zeta$ | 32              | 24                                                | 0       | 0       | 6       | 2        |
